# Supplementary material for: Economic Burden of Hospitalizations for Heat-Related Illnesses in the United States, 2001–2010
Source: MDPI journal article supplement (doi:10.3390/ijerph13090894), 2016-09-08
Supplement: s1 [file s1]

# Supplementary Materials: Economic Burden of Hospitalizations for Heat-Related Illnesses in the United States, 2001–2010

Michael T. Schmeltz, Elisaveta P. Petkova and Janet L. Gamble

**Table S1.** Comparison of nationally adjusted mean costs per hospitalization for patients by race, stratified by gender 2001–2010 (May–September).

| Characteristic  |   | All Hospitalizations                       | HRI Hospitalizations                       |
|-----------------|---|--------------------------------------------|--------------------------------------------|
|                 |   | Adjusted Mean Cost, 95% CI<br>(US Dollars) | Adjusted Mean Cost, 95% CI<br>(US Dollars) |
| Race, by Gender |   |                                            |                                            |
| White           | M | \$10,428 (\$10,419, \$10,437)              | \$5,101 (\$5,060, \$5,143)                 |
|                 | F | \$8,020 (\$8,014, \$8,025)                 | \$5,777 (\$5,703, \$5,851)                 |
| Black           | M | \$10,600 (\$10,577, \$10,623)              | \$5,379 (\$5,292, \$5,466)                 |
|                 | F | \$8,237 (\$8,223, \$8,251)                 | \$6,241 (\$6,092, \$6,391)                 |
| Hispanic        | M | \$8,899 (\$8,877, \$8,922)                 | \$5,328 (\$5,228, \$5,428)                 |
|                 | F | \$6,887 (\$6,875, \$6,899)                 | \$6,340 (\$6,112, \$6,567)                 |
| API             | M | \$9,746 (\$9,687, \$9,805)                 | \$6,147 (\$5,672, \$6,623)                 |
|                 | F | \$7,405 (\$7,374, \$7,437)                 | \$7,010 (\$6,484, \$7,536)                 |
| Native American | M | \$9,753 (\$9,636, \$9,871)                 | \$4,477 (\$4,019, \$4,936)                 |
|                 | F | \$7,475 (\$7,400, \$7,550)                 | \$5,444 (\$4,475, \$6,413)                 |
| Other           | M | \$9,851 (\$9,803, \$9,899)                 | \$4,581 (\$4,388, \$4,774)                 |
|                 | F | \$7,412 (\$7,383, \$7,440)                 | \$5,627 (\$5,203, \$6,050)                 |

All *t*-test comparisons were significant at the  $p < 0.01$  level.

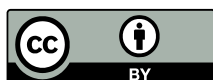

© 2016 by the authors; licensee MDPI, Basel, Switzerland. This article is an open access article distributed under the terms and conditions of the Creative Commons by Attribution (CC-BY) license (<http://creativecommons.org/licenses/by/4.0/>).
